# Supplementary material for: SuMO-Fil: Supervised multi-omic filtering prior to performing network analysis
Source: PubMed Central journal article supplement (PMC8330944; doi:10.1371/journal.pone.0255579), 2021-08-03
Supplement: pone.0255579.s001.pdf [file pone.0255579.s001.pdf]

# S1 Appendix

## Simulation Details

Network systems described in this manuscript involve two data types,  $\mathcal{G}$  and  $\mathcal{X}$  with a continuous outcome  $\mathbf{Y}$ . For our simulations, it is assumed that there are latent variables that describe sub-matrices contained in  $\mathcal{G}$  and  $\mathcal{X}$ . It is assumed that there are latent variables that describe the sub-matrix of network features  $\mathbf{G}$  contained in  $\mathcal{G}$  that lead to the behavior of network features  $\mathbf{X}$  contained in  $\mathcal{X}$ , which ultimately explain  $\mathbf{Y}$ . There is also an interactive effect between  $\mathbf{G}$  and  $\mathbf{X}$ . In addition to the network features, there may be other features that comprise  $\mathcal{G}$  and  $\mathcal{X}$ . There are latent variables that describe sub-matrices  $\mathbf{S}$  and  $\mathbf{H}$  within  $\mathcal{G}$  and  $\mathcal{X}$  that are individually related to  $\mathbf{Y}$  but not each other. These relationships may be expressed as a system of linear equations shown in (1). The covariance matrix  $\Sigma'$  for the latent variables ( $\mathbf{Y}$ ,  $\mathbf{X}$ ,  $\mathbf{G}$ ,  $\mathbf{S}$ ,  $\mathbf{H}$ )<sup>T</sup> is defined in (2).

$$\begin{aligned}
 \mathbf{Y} &= \beta_{Y|X.G}\mathbf{X} + \beta_{Y|G.X}\mathbf{G} + \beta_{Y|S}\mathbf{S} + \beta_{Y|H}\mathbf{H} + \epsilon_{Y|X,G,S,H} \\
 \mathbf{X} &= \beta_{X|G}\mathbf{G} + \epsilon_{X|G} \\
 \mathbf{G} &= \epsilon_G
 \end{aligned} \tag{1}$$

$$\Sigma' = \begin{bmatrix}
 \sigma_{Y|X.G.S.H} + \sigma_{X|G}\beta_{Y|X.G}^2 + \sigma_G\tau^2 + \sigma_S\beta_{Y|S}^2 + \sigma_H\beta_{Y|H}^2 & \sigma_{X|G}\beta_{Y|X.G} + \tau\sigma_G\beta_{X|G} & \sigma_G\tau & \beta_{Y|S}\sigma_S & \beta_{Y|H}\sigma_H \\
 \sigma_{X|G}\beta_{Y|X.G} + \tau\sigma_G\beta_{X|G} & \beta_{X|G}^2\sigma_G + \sigma_{X|G} & \sigma_G\beta_{X|G} & 0 & 0 \\
 \sigma_G\tau & \sigma_G\beta_{X|G} & \sigma_G & 0 & 0 \\
 \beta_{Y|S}\sigma_S & 0 & 0 & \sigma_S & 0 \\
 \beta_{Y|H}\sigma_H & 0 & 0 & 0 & \sigma_H
 \end{bmatrix} \tag{2}$$

There are also latent variables that describe sub-matrices  $\mathbf{G}'$  and  $\mathbf{X}'$  within  $\mathcal{G}$  and  $\mathcal{X}$  that are related

to each other but not related to  $\mathbf{Y}$ . Additionally, there are also sub-matrices  $\mathbf{e}_G$  and  $\mathbf{e}_X$  within  $\mathcal{G}$  and  $\mathcal{X}$  that contain independent noise variables. The covariance matrix  $\Sigma$  defined in (3) describes the relationships between all latent variables  $(\mathbf{Y}, \mathbf{X}, \mathbf{G}, \mathbf{S}, \mathbf{H}, \mathbf{X}', \mathbf{G}', \mathbf{e}_X, \mathbf{e}_G)^T$ .

$$\Sigma = \begin{bmatrix} \Sigma' & \mathbf{0} & \mathbf{0} & \mathbf{0} & \mathbf{0} \\ \mathbf{0} & \beta_{X|G}^2 \sigma_G + \sigma_{X|G} & \sigma_G \beta_{X|G} & \mathbf{0} & \mathbf{0} \\ \mathbf{0} & \sigma_G \beta_{X|G} & \sigma_G & \mathbf{0} & \mathbf{0} \\ \mathbf{0} & \mathbf{0} & \mathbf{0} & \sigma_{e_X} & 0 \\ \mathbf{0} & \mathbf{0} & \mathbf{0} & 0 & \sigma_{e_G} \end{bmatrix} \quad (3)$$

All simulations performed were generated under a multivariate normal distribution with the covariance structure defined in (3). For a given “subject”  $i$ , the latent values are first randomly generated from  $MVN(\mathbf{0}, \Sigma)$ . Denote the generated latent values for subject  $i$  as  $\mathbf{L}_i = (y_i, x_i, g_i, s_i, h_i, x'_i, g'_i, e_{X_i}, e_{G_i})^T$ . The features for subject  $i$  are then completed by generating each sub-matrix through a normal distribution with a mean of the latent value and the corresponding standard deviation. Thus, the  $i^{th}$  row of sub-matrix  $\mathbf{X}$  is generated by randomly sampling  $p'$  values from  $N(\mathbf{L}_i[2], Var(X))$ , where  $p'$  is the number of features contained in sub-matrix  $\mathbf{X}$ . A similar process is repeated for the other sub-matrices to complete all components within  $\mathcal{G}$  and  $\mathcal{X}$  for each subject. After the simulation is complete for  $\mathbf{Y}$ ,  $\mathcal{G}$ , and  $\mathcal{X}$ , the values are then centered as a final step. The signal strength may be controlled by calibrating the covariance structure to contain higher correlations amongst the signal latent variables within  $\mathcal{X}$  and  $\mathcal{G}$ .

Algorithm 1 describes the full details for the steps to execute the simulations performed in this manuscript. Additionally, the simulations may be performed through the `simPathwaySystem` function from the `SuMOFil` R package available at <https://github.com/lorinmil/SuMOFil>. The `simPathwaySystem` function involves many parameters to specify the strength of the network ( $\alpha$ ,  $Rsq$ ,  $rind$ ,  $noiseSD$ ), number of features within the datasets ( $nx$ ,  $nxPrime$ ,  $ns$ ,  $ng$ ,  $ngPrime$ ,  $nh$ ,  $ntranscriptNoise$ ,  $ngeneNoise$ ), and sample size ( $nsample$ ).

This manuscript performed simulations under 9 different simulation settings accounting for all possible

---

**Algorithm 1** Network Simulation

---

**Require:**  $alpha, Rsq, rind, noiseSD, nx, nxPrime, ns, ng, ngPrime, nh, ntranscriptNoise, ngeneNoise, nsample$

$$\tau = 1$$

$$\beta_{Y|X.G}^2 = \beta_{X|G}^2 = \beta_{Y|S} = \beta_{Y|H} = alpha$$

$$tau = (1 - Rsq)/Rsq$$

$$\sigma_{Y|X.G.S.H} = tau + (alpha * tau)^2 + 2 * tau * alpha^2$$

$$\sigma_{X|G} = alpha * tau$$

$$\sigma_G = 1$$

$$\sigma_S = \sigma_{X|G} + \sigma_G * alpha$$

$$\sigma_H = \sigma_G$$

$$\sigma_{e_X} = \sigma_{e_G} = noiseSD^2$$

Construct  $\Sigma_{9 \times 9}$  using formulas from (2) and (3)

$$tauInd = (1 - rind^2)/rind^2$$

**for**  $i = 1$  to  $nsample$  **do**

$$\mathbf{L} \sim \mathbf{N}_9(\mathbf{0}, \Sigma)$$

$$\mathbf{Y}[i] \sim N(\mathbf{L}[1], tauInd * \Sigma[1, 1])$$

**for**  $j = 1$  to  $nx$  **do**

$$\mathcal{X}[i, j] \sim N(\mathbf{L}[2], tauInd * \Sigma[2, 2])$$

**end for**

**for**  $j = nx + 1$  to  $nx + ns$  **do**

$$\mathcal{X}[i, j] \sim N(\mathbf{L}[4], tauInd * \Sigma[4, 4])$$

**end for**

**for**  $j = nx + ns + 1$  to  $nx + ns + nxPrime$  **do**

$$\mathcal{X}[i, j] \sim N(\mathbf{L}[6], tauInd * \Sigma[6, 6])$$

**end for**

**for**  $j = nx + ns + nxPrime + 1$  to  $nx + ns + nxPrime + ntranscriptNoise$  **do**

$$\mathcal{X}[i, j] \sim N(0, tauInd * \Sigma[8, 8] * \Sigma[1, 1])$$

**end for**

**for**  $j = 1$  to  $ng$  **do**

$$\mathcal{G}[i, j] \sim N(\mathbf{L}[3], tauInd * \Sigma[3, 3])$$

**end for**

**for**  $j = ng + 1$  to  $ng + nh$  **do**

$$\mathcal{G}[i, j] \sim N(\mathbf{L}[5], tauInd * \Sigma[5, 5])$$

**end for**

**for**  $j = ng + nh + 1$  to  $ng + nh + ngPrime$  **do**

$$\mathcal{G}[i, j] \sim N(\mathbf{L}[7], tauInd * \Sigma[7, 7])$$

**end for**

**for**  $j = ng + nh + ngPrime + 1$  to  $ng + nh + ngPrime + ngeneNoise$  **do**

$$\mathcal{G}[i, j] \sim N(0, tauInd * \Sigma[9, 9] * \Sigma[1, 1])$$

**end for**

**end for**

$$\mathbf{Y} = \mathbf{Y} - \text{mean}(\mathbf{Y})$$

$$\mathcal{X} = \mathcal{X} - \text{mean}(\mathcal{X})$$

$$\mathcal{G} = \mathcal{G} - \text{mean}(\mathcal{G})$$

**return**  $\mathbf{Y}, \mathcal{X}, \mathcal{G}$

---

combinations of weak, moderate, and strong network signal strength and small, medium, and large sized datasets. The parameters used in this manuscript are summarized in Table A.

**Table A: Simulation Parameter Settings.**

| <b>Signal Strength</b>    |              |                 |               |
|---------------------------|--------------|-----------------|---------------|
| <b>Parameter</b>          | <b>Weak</b>  | <b>Moderate</b> | <b>Strong</b> |
| <i>alpha</i>              | 0.35         | 0.35            | 0.35          |
| <i>Rsq</i>                | 0.35         | 0.85            | 0.85          |
| <i>rind</i>               | 0.35         | 0.35            | 0.85          |
| <i>noiseSD</i>            | 0.5          | 1               | 2             |
| <b>Number of Features</b> |              |                 |               |
| <b>Parameter</b>          | <b>Small</b> | <b>Medium</b>   | <b>Large</b>  |
| <i>nx</i>                 | 15           | 15              | 15            |
| <i>ns</i>                 | 50           | 50              | 50            |
| <i>nxPrime</i>            | 100          | 100             | 100           |
| <i>ntranscriptNoise</i>   | 5000         | 15000           | 25000         |
| <i>ng</i>                 | 10           | 10              | 10            |
| <i>nh</i>                 | 30           | 30              | 30            |
| <i>ngPrime</i>            | 100          | 100             | 100           |
| <i>ngeneNoise</i>         | 5000         | 10000           | 20000         |
