# Supplementary material for: SuMO-Fil: Supervised multi-omic filtering prior to performing network analysis
Source: PubMed Central journal article supplement (PMC8330944; doi:10.1371/journal.pone.0255579), 2021-08-03
Supplement: pone.0255579.s002.pdf [file pone.0255579.s002.pdf]

## S2 Appendix

### Alternative Summary Measures for SuMO-Fil

Phase 2 of SuMO-Fil involves estimating a similarity matrix between datasets  $\mathcal{G}$  and  $\mathcal{X}$  and summing across the absolute values of the similarity for each feature to obtain a measure for filtering. Other summary measures of the absolute similarities such as medians were also considered as opposed to summation on a handful of simulations. Table A summarizes the average number of features filtered and the average number of network features filtering across 5 simulations for each of the simulation settings. Similar to summation, median summaries also do not remove network features under strong or moderate network signal strengths regardless of the number of features involved. However, under weak network signal there were some simulations that unnecessarily filtered network features. These results are consistent with summation used for summary functions and should be further explored.

**Table A: Median Summary for Phase 2 in SuMO-Fil.**

| Simulation Settings |                  | # Features Filtered  | # Network Features Filtered |
|---------------------|------------------|----------------------|-----------------------------|
| Signal Strength     | Total # Features |                      |                             |
| Weak                | 45305            | $x = 3357, g = 2668$ | $x = 0, g = 0$              |
| Moderate            | 45305            | $x = 3423, g = 2647$ | $x = 0, g = 0$              |
| Strong              | 45305            | $x = 3796, g = 3115$ | $x = 0, g = 0$              |
| Weak                | 25305            | $x = 2072, g = 1380$ | $x = 0.4, g = 0$            |
| Moderate            | 25305            | $x = 2005, g = 1403$ | $x = 0, g = 0$              |
| Strong              | 25305            | $x = 3030, g = 1991$ | $x = 0, g = 0$              |
| Weak                | 15305            | $x = 729, g = 675$   | $x = 0.2, g = 0.2$          |
| Moderate            | 15305            | $x = 731, g = 708$   | $x = 0, g = 0$              |
| Strong              | 15305            | $x = 1127, g = 1101$ | $x = 0, g = 0$              |

SuMO-Fil was performed using median as opposed to summation for the second phase. This displays the average results based on 5 simulations under each simulation setting. Ideally, no network features should be removed while still reducing the total number of features in the datasets.
